# Supplementary material for: pong: fast analysis and visualization of latent clusters in population genetic data
Source: PubMed Central journal article supplement — Bioinformatics. 2016 Jun 9;32(18):2817–23. doi: 10.1093/bioinformatics/btw327 (PMC5018373; doi:10.1093/bioinformatics/btw327), 2016-06-09
Supplement: supp_btw327_Behretal_SupplementaryInformation.pdf [file supp_btw327_Behretal_SupplementaryInformation.pdf]

# Supplementary Text for “pong: a network-graphical approach for the analysis of population structure”

Aaron A. Behr<sup>1,2,\*</sup>, Gracie Liu-Fang<sup>3,†</sup>, Katherine Z. Liu<sup>2,†</sup>, Priyanka Nakka<sup>1,4</sup>,  
and Sohini Ramachandran<sup>1,4\*</sup>

<sup>1</sup>Department of Ecology and Evolutionary Biology, Brown University, Providence, RI, USA

<sup>2</sup>Department of Computer Science, Brown University, Providence, RI, USA

<sup>3</sup>Computer Science Department, Wellesley College, Wellesley, MA, USA

<sup>4</sup>Center for Computational Molecular Biology, Brown University, Providence, RI, USA

## Cluster similarity metrics

We implemented and tested several metrics for cluster similarity. The default metric used by `pong`,  $\mathcal{J}$  (Equation 1), is derived from the Jaccard index used in set comparison. For a given pair of clusters  $\{\vec{q}\cdot_a, \vec{r}\cdot_b\}$ , let  $N^*$  be the set of indices for which at least one of  $\{\vec{q}\cdot_a, \vec{r}\cdot_b\}$  has a nonzero entry; that is,  $N^* = \{i \in \{1, \dots, N\} : q_{ia} + r_{ib} > 0\}$ . Then,

$$\mathcal{J}(\vec{q}\cdot_a, \vec{r}\cdot_b) = 1 - \sqrt{\frac{\sum_{i \in N^*} (q_{ia} - r_{ib})^2}{2|N^*|}} \quad (1)$$

$\mathcal{J}$  is designed to emphasize overlap in membership coefficients while ignoring overlap in nonmembership (i.e., individuals with membership coefficients of 0 in the clusters under comparison). Although we recommend using  $\mathcal{J}$ , `pong` implements other similarity metrics:  $G'$  (as used in *CLUMPP* Jakobsson and Rosenberg (2007)), the average sum of squared differences between  $\vec{q}\cdot_a$  and  $\vec{r}\cdot_b$  (subtracted from 1), and average Manhattan distance (subtracted from 1). `pong`'s implementation is designed such that users familiar with Python and NumPy can add their own similarity metrics to the source code if desired.

## Processing of 1000 Genomes Data

Variant calls for 1,019,196 genome-wide single-nucleotide variants (SNVs) in 2,504 individuals were extracted from the 1000 Genomes Project Phase 3 data repository `ftp://ftp.1000genomes.ebi.ac.uk/vol11/ftp/release/20130502/` (release date: Nov 6, 2014), using the command-line tool `tabix` (Li, 2011).

A total of 78 individuals were excluded from analysis based on relatedness: one individual from each pair of first- and second-degree relatives was removed, leaving a total of 2,426 individuals. Next, SNVs were pruned for linkage disequilibrium using the `-indep-pairwise` flag in PLINK (Purcell et al., 2007). We removed every SNV with  $r^2 > 0.1$  with any other SNV within a 50-SNV sliding window (PLINK command-line parameters for `-indep-pairwise: 50 10 0.01`), leaving a total of 225,705 SNVs for analysis.

---

\*To whom correspondence should be addressed: `aaron_behr@alumni.brown.edu`, `sramachandran@brown.edu`

†These authors contributed equally to this work.

ADMIXTURE (Alexander *et al.*, 2009) was applied 10 times per value of  $K$  to these data, with  $K$  taking on values in the closed interval  $[2, 10]$ . The value of  $K$  that minimized cross-validation error was  $K = 8$ .

## Supplementary Figure Captions

Figure S1: pong's main visualization of major modes in population structure in the 1000 Genomes (phase 3) with detailed population labels,  $K = 2$  through  $K = 10$ .

Figure S2: CLUMPAK's (Kopelman *et al.*, 2015) visualization of modes in population structure in the 1000 Genomes (phase 3),  $K = 2$  through  $K = 10$ .

Figure S3: pong's visualization of population structure in the 1000 Genomes (phase 3), based on  $Q$  matrices from Consortium (2015),  $K = 5$  through  $K = 25$ .

## References

- Alexander, D. H., Novembre, J., and Lange, K. (2009). Fast model-based estimation of ancestry in unrelated individuals. *Genome Research*, **19**(9), 1655–1664.
- Consortium, T. . G. P. (2015). A global reference for human genetic variation. *Nature*, **526**(7571), 68–74.
- Jakobsson, M. and Rosenberg, N. a. (2007). CLUMPP: a cluster matching and permutation program for dealing with label switching and multimodality in analysis of population structure. *Bioinformatics (Oxford, England)*, **23**(14), 1801–6.
- Kopelman, N. M., Mayzel, J., Jakobsson, M., Rosenberg, N. A., and Mayrose, I. (2015). C LUMPAK : a program for identifying clustering modes and packaging population structure inferences across K. *Molecular Ecology Resources*, pages doi: 10.1111/1755-0998.12387.
- Li, H. (2011). Tabix: fast retrieval of sequence features from generic TAB-delimited files. *Bioinformatics*, **27**, 718–9.
- Purcell, S., Neale, B., Todd-Brown, K., Thomas, L., Ferreira, M. A., Bender, D., Maller, J., Sklar, P., De Bakker, P. I., Daly, M. J., and Sham, P. C. (2007). PLINK: a tool set for whole-genome association and population-based linkage analyses. *The American Journal of Human Genetics*, **81**(3), 559–575.

Figure S1

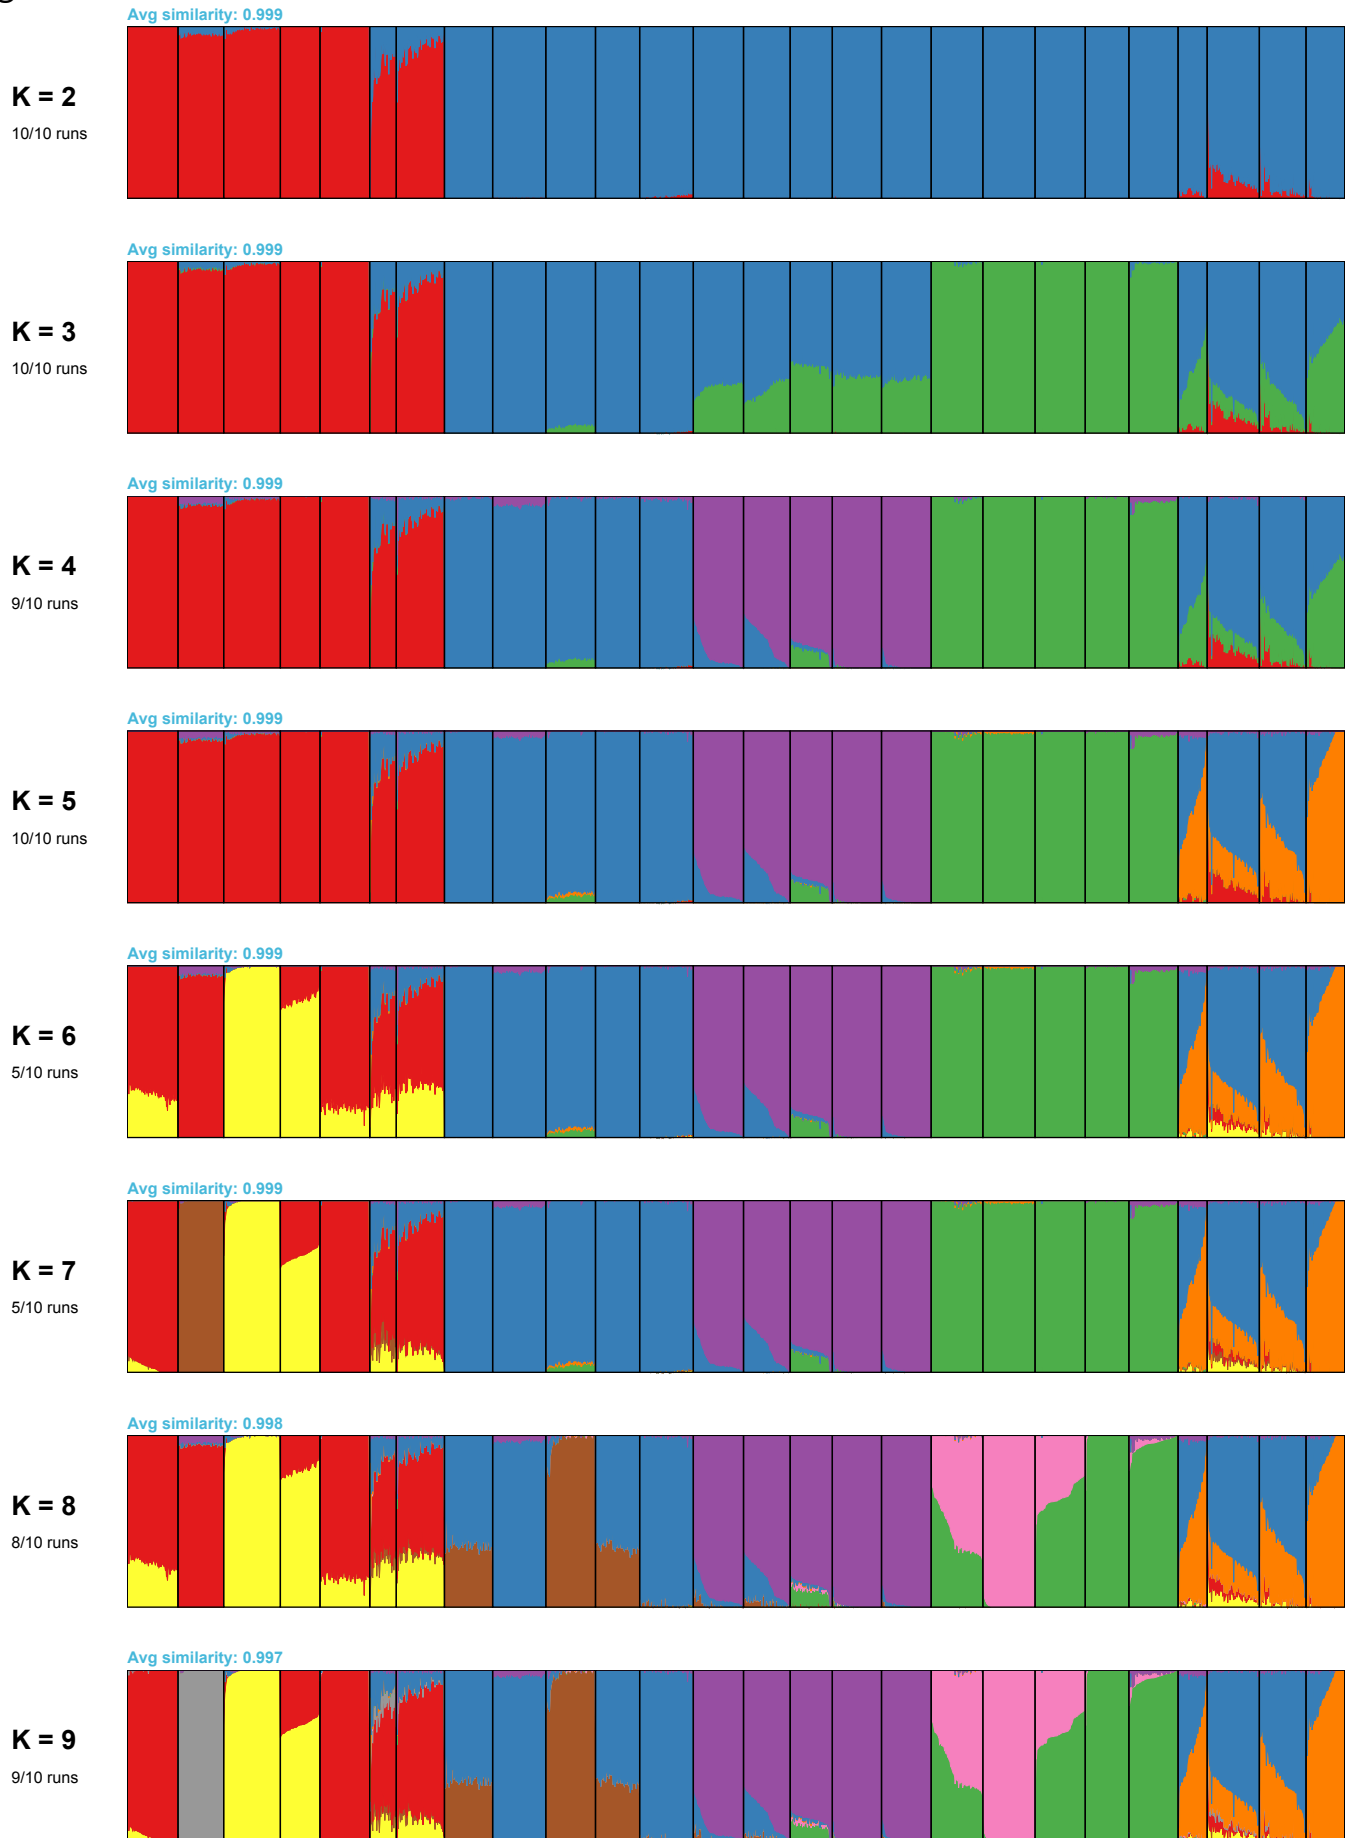

Avg similarity: 1

**K = 10**  
4/10 runs

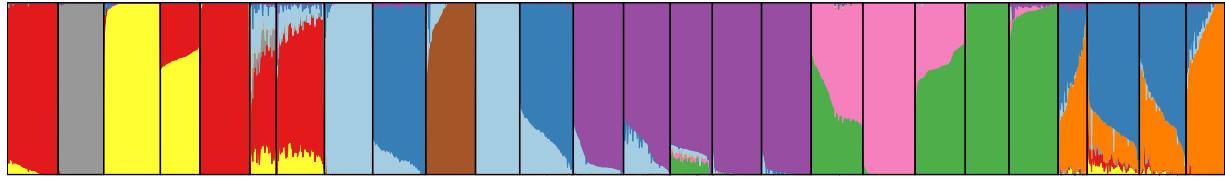

- Peruvians from Lima, Peru
- Colombians from Medellin, Colombia
- Puerto Ricans from Puerto Rico
- Mexican Ancestry from Los Angeles USA
- Kinh in Ho Chi Minh City, Vietnam
- Chinese Dai in Xishuangbanna, China
- Southern Han Chinese
- Japanese in Tokyo, China
- Han Chinese in Beijing, China
- Indian Telugu from the UK
- Sri Lankan Tamil from the UK
- Bengali from Bangladesh
- Punjabi Indian from Houston, Texas
- Gujarati Indian from Scotland
- Iberian Population in Spain
- British in England and Scotland
- Finnish in Finland
- Toscani in Italy
- "Utah Residents (CEPH) with Northern and Western European Ancestry"
- African Caribbeans in Barbados
- Americans of African Ancestry in SW USA
- African Caribbeans in the Gambia
- Esan in Nigeria
- Mende in Sierra Leone
- Gambian in Western Divisions in the Gambia
- Luhya in Webuye, Kenya
- Yoruba in Ibadan, Nigeria

# CLUMPAK main pipeline - Job 1439007297 summary

Major modes for the uploaded data:

K=2

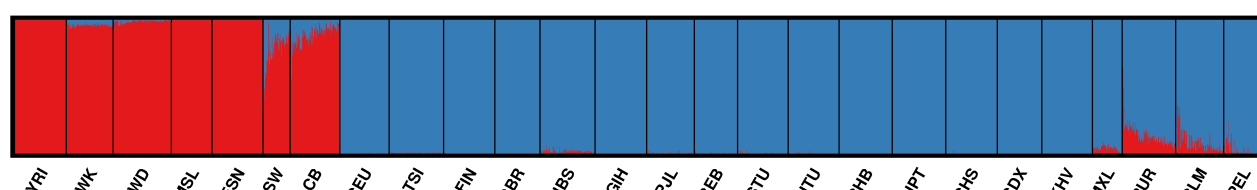

K=3

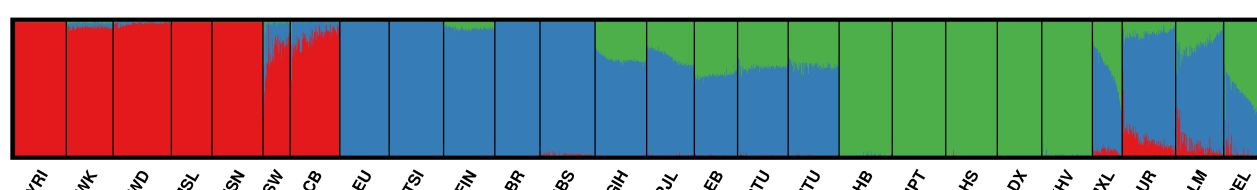

K=4

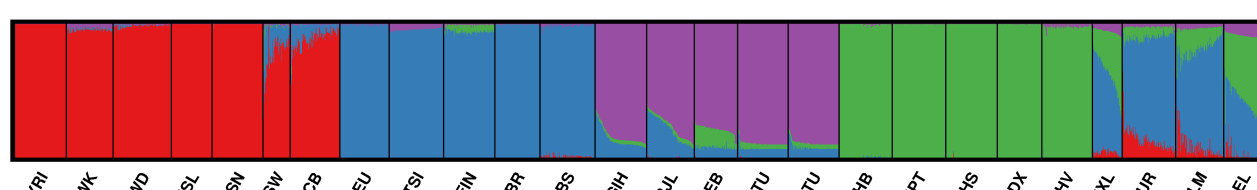

K=5

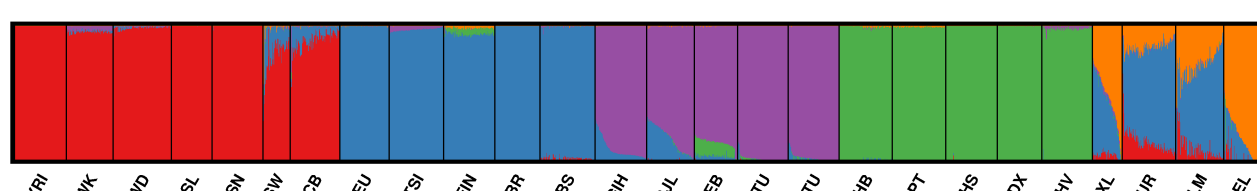

K=6

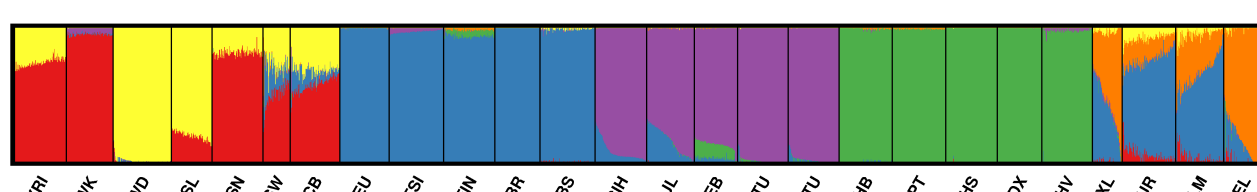

K=7

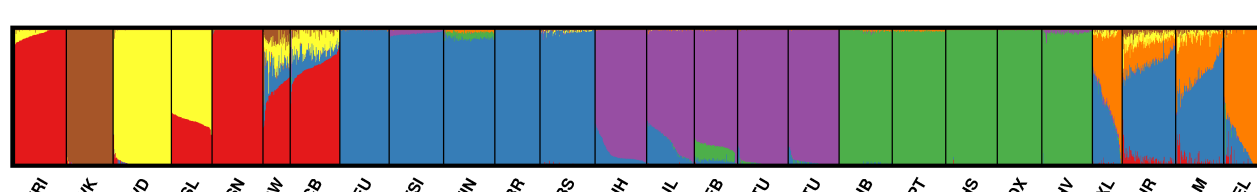

K=8

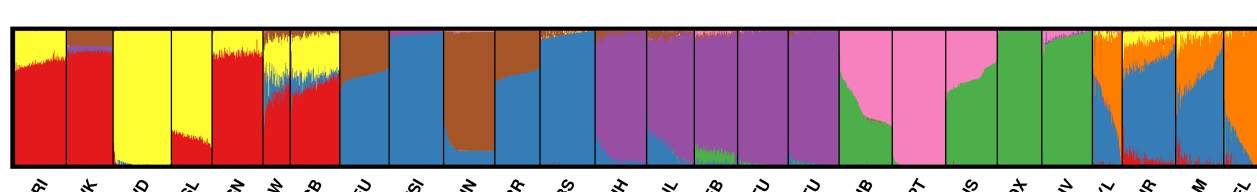

K=9

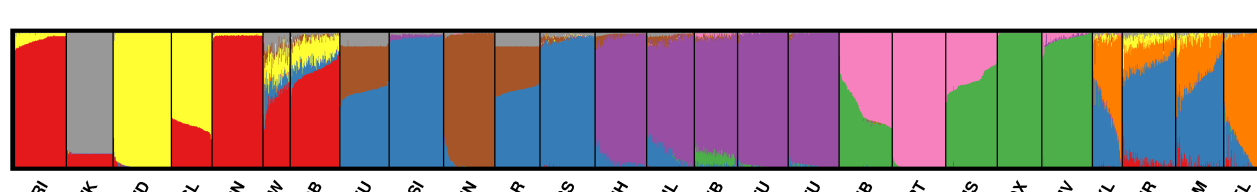

K=10

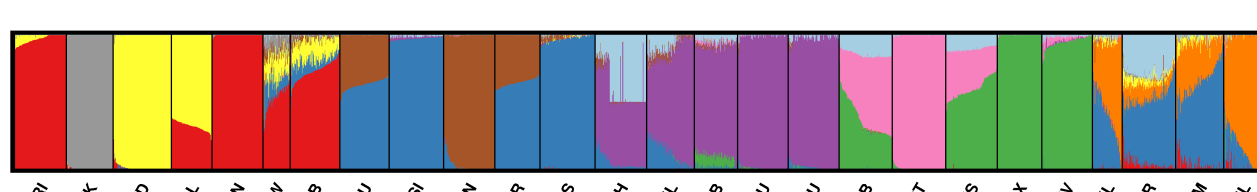

Minor modes for the uploaded data:

K=6 MinorCluster1

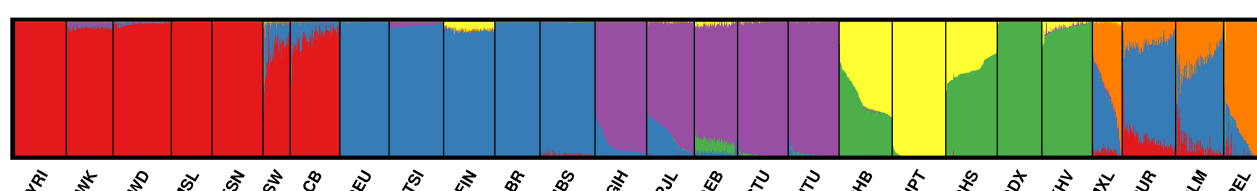

K=6 MinorCluster2

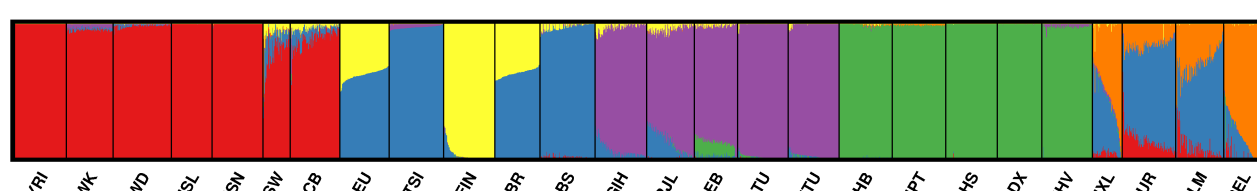

K=7 MinorCluster1

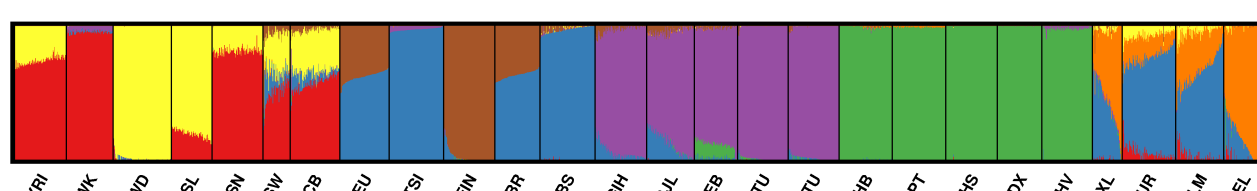

K=7 MinorCluster2

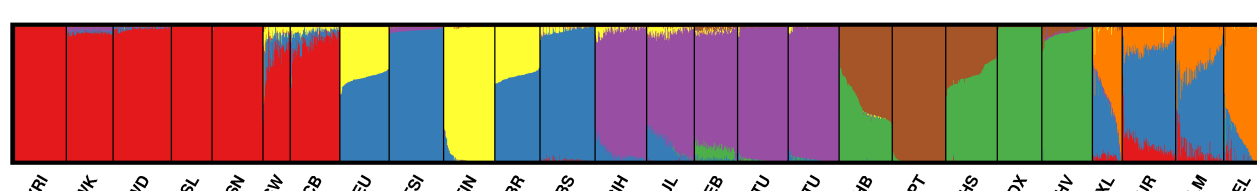

K=8 MinorCluster1

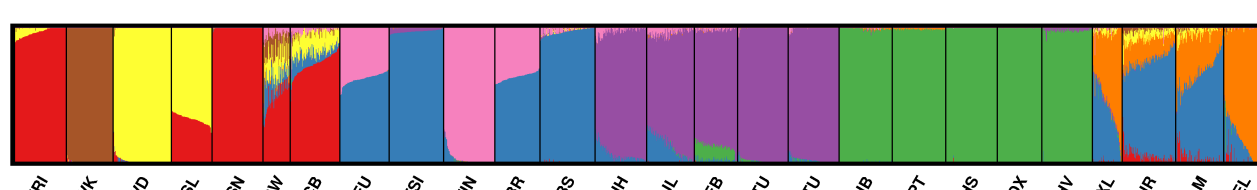

K=10 MinorCluster1

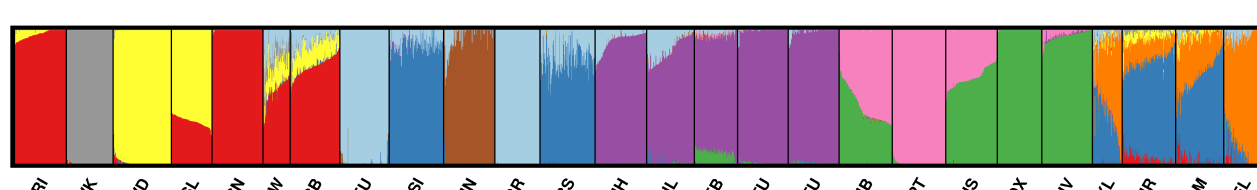

Division of runs by mode:

- K=2 10/10
- K=3 10/10
- K=4 10/10
- K=5 10/10
- K=6 5/10, 3/10, 2/10
- K=7 5/10, 3/10, 2/10
- K=8 9/10, 1/10
- K=9 10/10
- K=10 6/10, 4/10

Figure S3

**K = 5**

1/1 runs

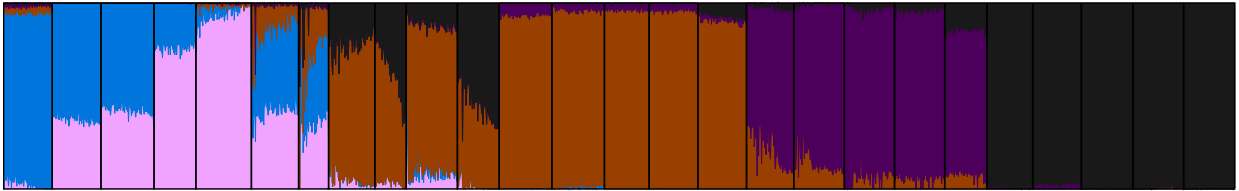

**K = 6**

1/1 runs

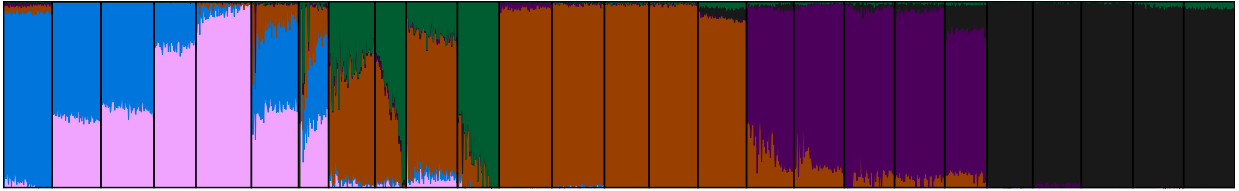

**K = 7**

1/1 runs

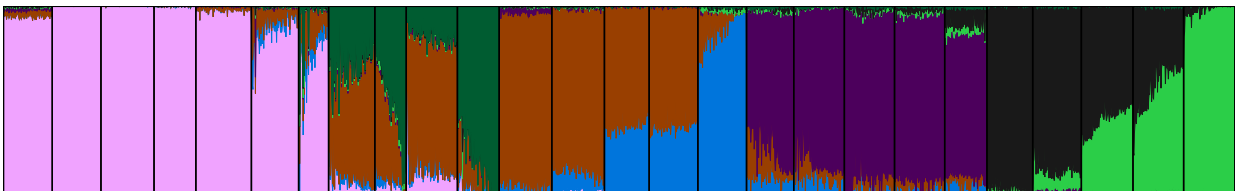

**K = 8**

1/1 runs

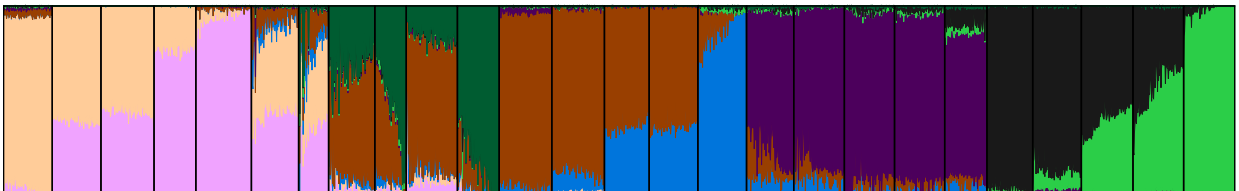

**K = 9**

1/1 runs

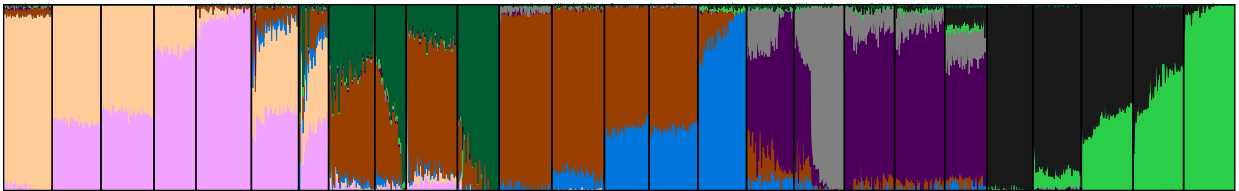

**K = 10**

1/1 runs

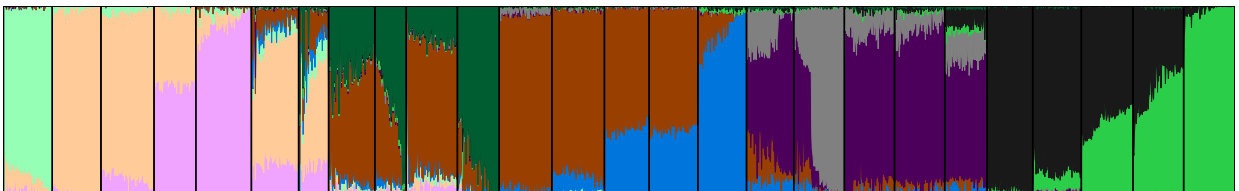

**K = 11**

1/1 runs

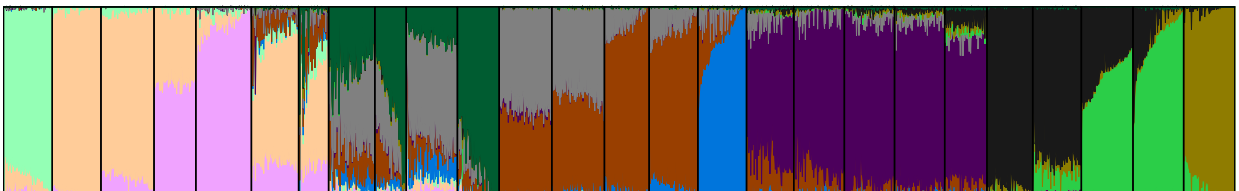

**K = 12**

1/1 runs

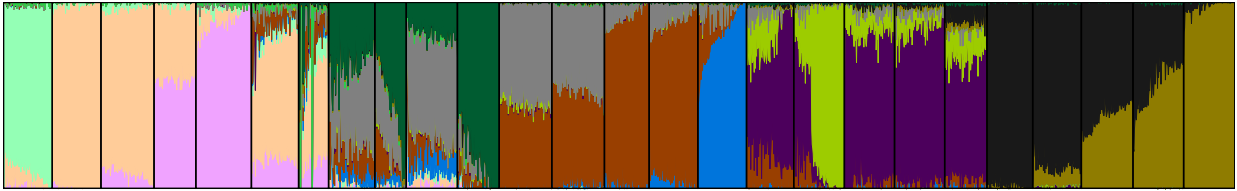

**K = 13**

1/1 runs

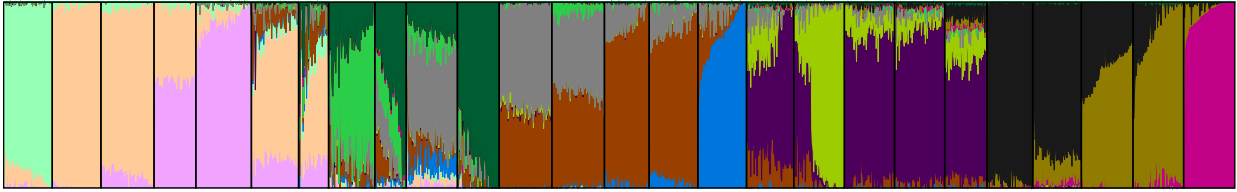

**K = 14**

1/1 runs

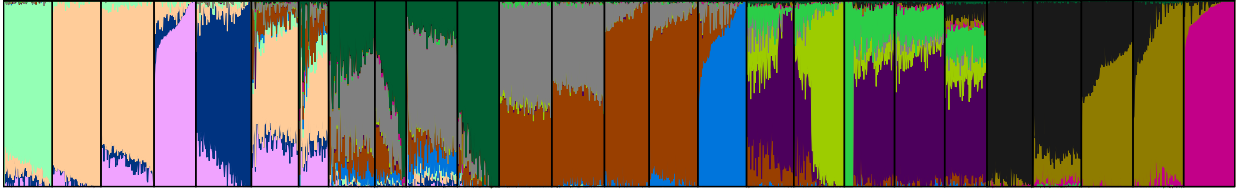

**K = 15**

1/1 runs

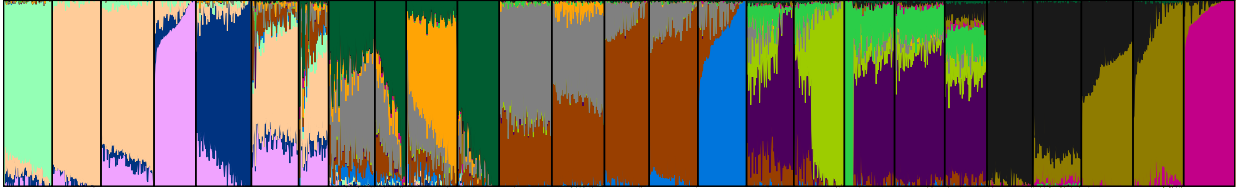

**K = 16**

1/1 runs

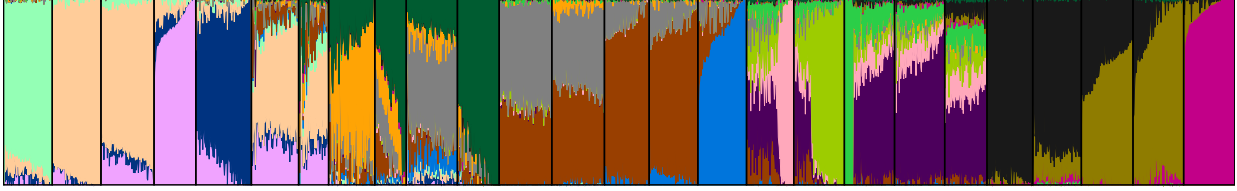

**K = 17**

1/1 runs

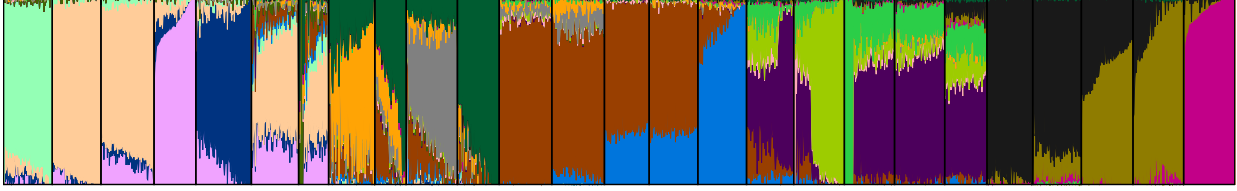

**K = 18**

1/1 runs

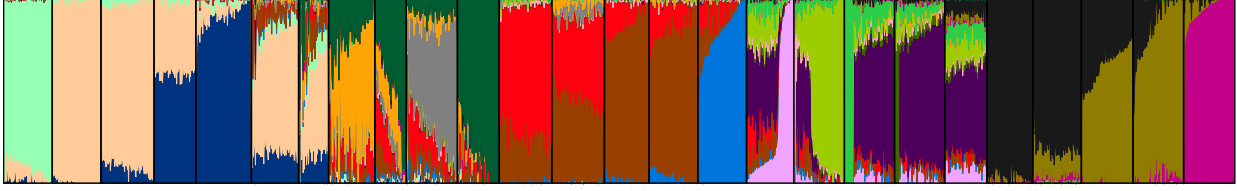

**K = 19**

1/1 runs

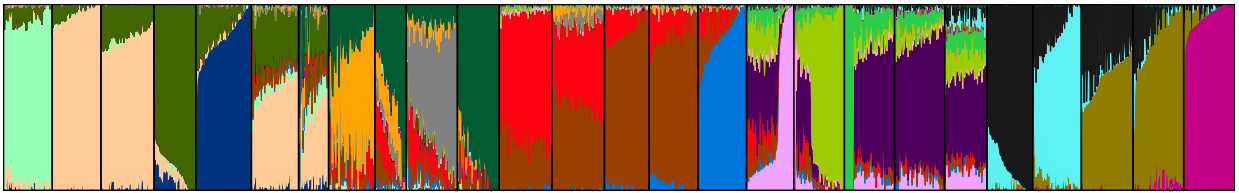

**K = 20**

1/1 runs

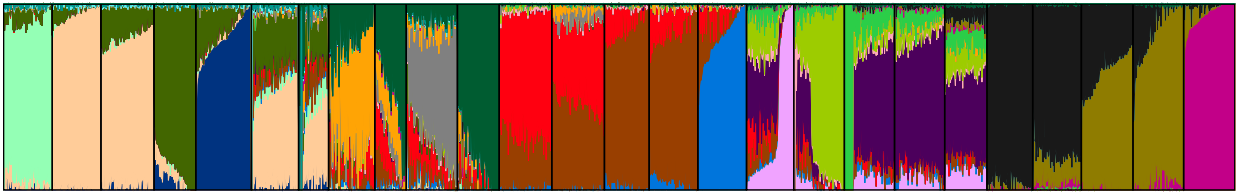

**K = 21**

1/1 runs

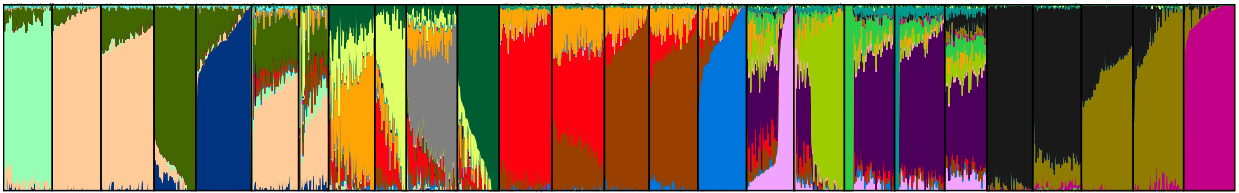

**K = 22**

1/1 runs

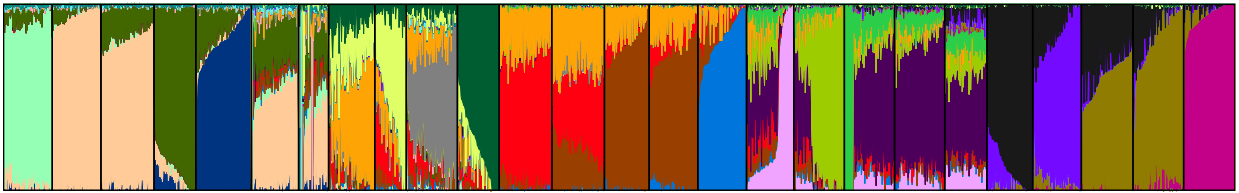

**K = 23**

1/1 runs

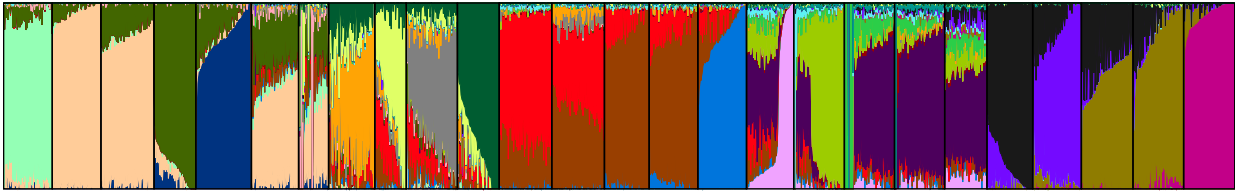

**K = 24**

1/1 runs

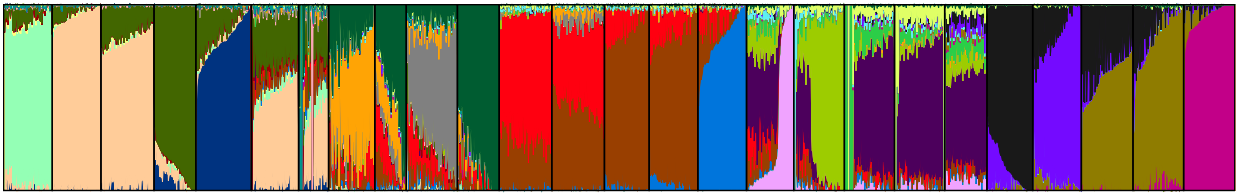

**K = 25**

1/1 runs

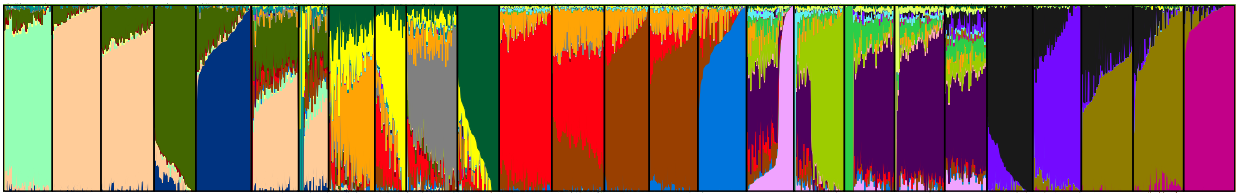

LWK ESN YRI MSL GWD ACB ASW CLM MXL PUR PEL TSI IBS GBR CEU FIN PJL GIH ITU STU BEB CDX KHV CHS CHB JPT
